# Supplementary material
Source: PubMed Central journal article supplement (PMC4310649)
Supplement: ASN.2013091013_ASN2013091013SupplementaryData.pdf [file ASN.2013091013_ASN2013091013SupplementaryData.pdf]

# Supplemental Table 1

## Missense Mutations Analyzed

|       |       |                |                 |                 |        |       |                 |        |        |
|-------|-------|----------------|-----------------|-----------------|--------|-------|-----------------|--------|--------|
| exon1 | M1L   | G196V          | A356V           | K478E           | exon15 | G613S | V677M           | exon23 | R904Q  |
|       | T60M  | exon5<br>R209W | exon9<br>G374V  | exon12<br>D486N |        | S615L | V677L           | exon24 | R919C  |
|       | D62N  | L215P          | exon10<br>R399C | G496C           |        | S615W | exon18<br>A728T | exon25 | R955Q  |
|       | E68K  | A226P          | S402F           | A523T           |        | L623P | G731R           |        | R958G  |
|       | H69N  | G230D          | N406H           | exon13<br>F535L |        | G630V | L738R           |        | S967F  |
|       | R83W  | V242A          | C421R           | L542P           |        | R642C | G741R           | exon26 | G980R  |
| exon3 | R145H | exon6<br>R261C | N426K           | S555L           |        | R642H | exon22<br>L849H |        | C985Y  |
|       | V153M | G264R          | C430G           | P560H           |        | R642G | L850P           |        | R1009Q |
|       | R158Q | exon7<br>T304P | G439S           | exon14<br>A569V | exon16 | V647M | R852C           |        | N1014K |
|       | T163M | S314F          | G439V           | A569E           |        | T649R | R852S           |        | V1015M |
| exon4 | W172R | G316V          | N442K           | L571P           |        | R655H | R852H           |        |        |
|       | T180K | exon8<br>G342A | G463E           | V578M           |        | R655C | G867S           |        |        |
|       | G186D | P349L          | A464T           | A588V           |        | M672I | R871H           |        |        |

# Supplemental Table 2

## SLC12A3 Splice Site Strength\*

| Intron | 5' donor site      | 3' acceptor site   |
|--------|--------------------|--------------------|
| 6      | 1                  | 0.86               |
| 7      | 0.98               | <b><u>0.33</u></b> |
| 8      | 1                  | 0.98               |
| 9      | 0.99               | 0.99               |
| 10     | 0.88               | 0.19               |
| 11     | 0.99               | 0.09               |
| 12     | 1                  | 0.01               |
| 13     | 0.99               | 0.12               |
| 14     | 0.96               | 0.82               |
| 15     | 0.99               | 0.96               |
| 16     | <b><u>0.67</u></b> | 0.97               |
| 17     | 0.54               | 0.98               |
| 18     | 0.91               | 0.98               |
| 19     | 0.71               | 0.97               |

\*Scores were determined using the BDGP splicing predictor program ([http://www.fruitfly.org/seq\\_tools/splice.html](http://www.fruitfly.org/seq_tools/splice.html))

# Supplemental Figure 1

## Heterozygous Deletion in cDNA

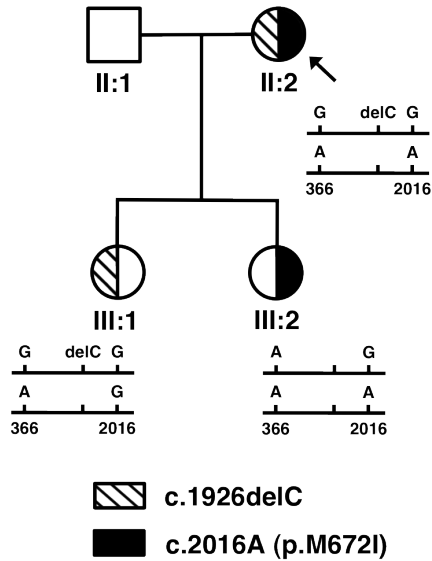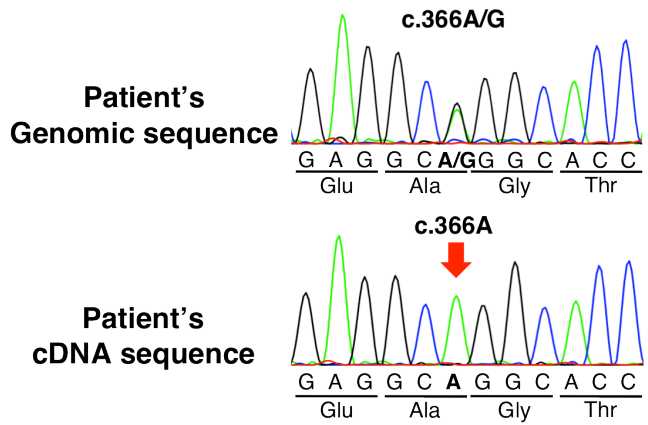

# Supplemental Table 3 Primers List

|                       | Forward primer                         | Reverse primer                         |
|-----------------------|----------------------------------------|----------------------------------------|
| <For H492>            |                                        |                                        |
| exon8                 | 5'-GATAGCTAGCGGACTCTACTACCCAGGAATC-3'  | 5'-GATAGGATCCAACAACCTCAGAACGGGAATG-3'  |
| exon10                | 5'-GATAGCTAGCGGACACACCTTCATTGTCATC-3'  | 5'-GATAGGATCCTGGCACTTCATCCCTACTG-3'    |
| exon16                | 5'-GATAGTAGCCCCCTGGATTATAGGTGGGAAG-3'  | 5'-GATAGGATCCGTCTCAAACCTCCTGACCTCG-3'  |
| <For uptake assay>    |                                        |                                        |
|                       | 5'-GATAGGATCCATGGCAGAAGTCCCAACACAG -3' | 5'-GATAGCGGCCGCTTACTGGCAGTAAAAAGGTG-3' |
| <For semi-nested PCR> |                                        |                                        |
| first                 | 5'-TCCTCCTGCTCTATGTCATCTAC-3'          | 5'-CAGTTCTTCTTGAACCCCAACCAC-3'         |
| second                | 5'-GCCTTGATCTTCCTCTTGTTCAG-3'          | (-)                                    |
